# Supplementary material for: Diel and seasonal variability of methane emissions from a shallow and eutrophic pond
Source: Copernicus journal article supplement (doi:10.5194/bg-2020-178), 2020-07-01

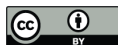

1     Diel and seasonal variability of methane emissions from a shallow  
2                                              and eutrophic pond

3             Wenli Zhang<sup>1</sup>, Shangbin Xiao<sup>2\*</sup>, Heng Xie<sup>1</sup>, Jia Liu<sup>2</sup>, Dan Lei<sup>2</sup>, Andreas Lorke<sup>3</sup>

4

5

6             1 Hubei International Scientific and Technological Cooperation Center of Ecological  
7     Conservation and Management in Three Gorges Area, China Three Gorges University,  
8                                              Yichang, 443002, China;

9             2 College of Hydraulic & Environmental Engineering, China Three Gorges University,  
10                                             Yichang, 443002, China;

11            3 Institute for Environmental Sciences, University of Koblenz-Landau, Landau, Germany

12

13

14     Email address for each author listed:

15     [zhangwenli@ctgu.edu.cn](mailto:zhangwenli@ctgu.edu.cn); [shangbinx@163.com](mailto:shangbinx@163.com); [1182696787@qq.com](mailto:1182696787@qq.com); [ljjia@ctgu.edu.cn](mailto:ljjia@ctgu.edu.cn);

16     [leidan@ctgu.edu.cn](mailto:leidan@ctgu.edu.cn); [lorke@uni-landau.de](mailto:lorke@uni-landau.de);

---

\* Corresponding author. e-mail: shangbinx@163.com

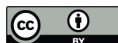

17 **Abstract**

18 Ponds play a critical role in biogeochemical carbon cycling and have been identified as hot  
19 spots of methane (CH<sub>4</sub>) emission. Yet, most existing studies focused on ponds in the boreal  
20 zone and current estimates of the relevance of ponds in global CH<sub>4</sub> budgets as well as  
21 knowledge of the environmental factors regulating their emissions are poorly constrained. Both  
22 nutrient concentration and temperature can potentially alter CH<sub>4</sub> dynamics in shallow ponds,  
23 but there are still few investigations into the response of CH<sub>4</sub> emission to nutrient enrichment  
24 and rising temperatures. Here we studied the magnitude and regulation of two CH<sub>4</sub> pathways  
25 (diffusion and ebullition) from a shallow and eutrophic pond located in the subtropical zone in  
26 Central China. Ebullitive fluxes were on average 96.4 mg CH<sub>4</sub>·m<sup>-2</sup>·d<sup>-1</sup> and contributed 88.6%  
27 to the total (diffusive + ebullition) CH<sub>4</sub> emissions. Daily CH<sub>4</sub> fluxes were related to daily mean  
28 water temperature, with ebullition having a stronger temperature dependence than diffusion  
29 ( $Q_{10}$  of 5.52 vs. 2.05). Relationships between temperature and CH<sub>4</sub> emission were affected by  
30 seasonal variation of the concentration of total phosphorus. The temperature dependence of  
31 both ebullitive and diffusive fluxes increased with increasing phosphorous concentration. Our  
32 study highlights that increasing eutrophication by anthropogenic impacts and climate warming  
33 will increase CH<sub>4</sub> emissions from ponds, thus representing a positive feedback mechanism to  
34 global warming.

35

36 Keywords: Subtropical pond; eutrophication; Diel pattern; Temperature dependence; CH<sub>4</sub>  
37 ebullition;

38



39 **1. Introduction**

40 Methane (CH<sub>4</sub>) is an important climate forcing as well as a sensitive indicator of climate  
41 change due to its increasing atmospheric concentration and its strong global warming  
42 potential, which is 28–36 times higher compared to CO<sub>2</sub> (Houghton et al., 2001; Loulergue  
43 et al., 2008). Recent estimates report a 150% increase of atmospheric CH<sub>4</sub> concentration since  
44 1750, which is unprecedented over the last 800,000 years (IPCC, 2014). Therefore, a better  
45 understanding of CH<sub>4</sub> sources and sinks is urgently needed.

46 Freshwater ecosystems are important for the biogeochemical processes involved in the  
47 cycling of CH<sub>4</sub> (Kirschke et al., 2013; Davidson et al., 2015). There is increasing evidence  
48 that freshwaters are a globally significant source of CH<sub>4</sub> (e.g. Lundin et al., 2013). But global  
49 CH<sub>4</sub> estimates of freshwaters are based on upscaling of few measurements and still highly  
50 uncertain (Rasilo et al., 2015). And before that, numerous ponds and lakes were often  
51 considered as minor emitters and their importance was neglected compared to wetland  
52 emissions (Wik et al., 2016b). Even small ponds were excluded from most estimates of global  
53 carbon budgets (Hanson et al., 2007). However, existing observations of CH<sub>4</sub> fluxes from  
54 lakes and ponds suggest that they are emission hot spots (Bastviken et al., 2011; Natchimuthu  
55 et al., 2014; Wik et al., 2016a). Especially the small ponds, comprising the majority of lentic  
56 aquatic systems (Downing et al., 2006), tend to have higher dissolved CH<sub>4</sub> concentration than  
57 larger lakes (Downing et al., 2008; Holgerson, 2015). Holgerson and Raymond (2016) found  
58 that very small ponds accounted for 40.6% of diffusive CH<sub>4</sub> emissions from lakes and ponds  
59 globally, due to their shallow depth, high sediment to water volume ratios, and frequent  
60 mixing. Wik et al. (2016a) compared CH<sub>4</sub> emissions from water bodies north of 50°N, and



61 found that small ponds are an important source of CH<sub>4</sub> in northern latitudes. Nevertheless,  
62 current data on the abundance, size, and rate of carbon emissions of small ponds are scarce,  
63 which may lead to considerable bias at the regional and global scale (Hanson et al., 2007).  
64 More research on the cycling of the CH<sub>4</sub> in ponds will be beneficial to more accurately quantify  
65 carbon fluxes from inland waters (Holgerson and Raymond, 2016).

66 Several studies have explored the dynamics of CH<sub>4</sub> concentrations and fluxes and have  
67 linked them to the pond depth and size, weather variables, organic carbon loading and  
68 nutrient status (Hamilton and Kelly, 1994; Kankaala et al., 2013; Xiao et al., 2014;  
69 Natchimuthu et al., 2014; Holgerson, 2015; Burger et al., 2016). Yet, some studies often relied  
70 on short term (30 min) measurements at monthly intervals and temporal variability was poorly  
71 resolved (Peixoto et al., 2015). There is still a lack of robust relationships between pond CH<sub>4</sub>  
72 and its potential drivers that could facilitate temporal prediction and spatial extrapolation. In  
73 addition, most of the studies on CH<sub>4</sub> fluxes from ponds are from the boreal zone, which limits  
74 our understanding of inland water carbon cycling at larger scales.

75 CH<sub>4</sub> can be emitted from aquatic systems through different pathways, including ebullition  
76 (bubble emission from sediments) and diffusion (gas exchange at the air-water interface).  
77 Small and shallow ponds are expected to become hot spots of ebullition due to limited  
78 stratification, sediment temperature being strongly related to atmospheric temperature, and  
79 direct solar warming of the sediments (Aben et al., 2017). However, most studies focused on  
80 diffusive fluxes and neglected the large emission component of ebullition (Aben et al., 2017).  
81 In fact, eutrophic ponds have greater potential for CH<sub>4</sub> ebullition because they accumulate  
82 more organic carbon (Downing et al., 2008; Anderson et al., 2014). Increasing eutrophication



83 of aquatic ecosystems by human activities may eventually promote CH<sub>4</sub> ebullition, and the  
84 strongest increase in ebullition can be expected in shallow water bodies (West et al., 2016;  
85 Aben et al., 2017).

86 In addition, carbon dynamics in small ponds may be more sensitive to seasonal variation,  
87 such as temperature change (Holgerson, 2015). The proportion of ebullitive and diffusive  
88 fluxes to total CH<sub>4</sub> emissions may be disproportionally affected by changes in temperature  
89 and the temperature dependence of CH<sub>4</sub> fluxes is different with different degrees of aquatic  
90 eutrophication (DelSontro et al., 2016). However, there is still no corresponding model basis  
91 to evaluate how the magnitude and relative contributions of CH<sub>4</sub> ebullition and diffusion may  
92 respond to climatic and environmental changes, including global warming and cultural  
93 eutrophication.

94 This study analyzes CH<sub>4</sub> emissions from a subtropical, shallow and small eutrophic pond in  
95 Central China, measured with floating chambers at high temporal resolution (diel variations).  
96 We aim at: 1) quantifying CH<sub>4</sub> emissions including diffusive flux and ebullition, with a  
97 particular focus on ebullition and its contribution to total CH<sub>4</sub> fluxes; 2) identifying their main  
98 influencing factors; and 3) assessing the temperature dependence of ebullitive and diffusive  
99 fluxes with different degrees of aquatic eutrophication.

## 100 **2. Materials and methods**

### 101 2.1 Study area and monitoring sites

102 The study was conducted in a small and shallow pond, which is located on the campus of  
103 China Three Gorges University, Yichang city, Hubei province, Central China (111°18'23"E,  
104 30°43'24"N). The region is under a subtropical continental monsoon climate regime. The



105 average depth of the pond is 1.2 m, and its area is approximately 4000 m<sup>2</sup>. The pond bottom  
106 was solidified with concrete in 2002-2003 and is now covered with about 20 cm of soft  
107 sediments. The main sources of water are natural rainfall and drainage water from streets.  
108 **Twelve monthly field campaigns, resolving diurnal variations** respectively, were conducted  
109 between 19 January and 29 December, 2016. All measurements were done at the **same sampling**  
110 site, which was **located 0.5 m away from the bank where water depth was ~0.7 m.**

## 111 2.2 In situ CH<sub>4</sub> flux measurement

112 CH<sub>4</sub> flux was measured using **a** static floating chamber and followed the methods described  
113 in Xiao et al. (2014). The chamber was made of a non-transparent, thermally insulated vertical  
114 tube with a volume of 43.30 L and a surface area of 0.096 m<sup>2</sup> (diameter and height are 0.35 and  
115 0.45 m respectively). Two fans (12 V, 0.22 A) were fixed in the upper part of the chamber to  
116 properly mix the air in the chamber headspace while not disturbing the water surface. The  
117 chamber was connected to a CH<sub>4</sub> Analyzer (G2301, Picarro, USA), which was used to monitor  
118 the CH<sub>4</sub> concentrations inside the chamber continuously at a frequency of 1 Hz. One buoy was  
119 fixed at the lower portion of the chamber, allowing for precise adjustment of the penetration  
120 depth of the chamber edge into the water. We used 5 cm penetration depth and only the  
121 headspace volume above the water surface was taken into account when calculating the gas  
122 flux.

123 Each field campaign was conducted for 24 hours. A single flux measurement was usually  
124 finished within 20 minutes and **48 consecutive measurements** were conducted during each field  
125 campaign. When there was no or little ebullition, CH<sub>4</sub> concentration in the chamber headspace  
126 increased nearly linearly over time and single linear regression was used to estimate the



127 diffusive flux of CH<sub>4</sub> ( $D_{CH_4}$ , mg CH<sub>4</sub>·m<sup>-2</sup>·h<sup>-1</sup>) (Lambert and Fréchet, 2005). When gas bubbles  
128 occurred, the gas concentration in the chamber increased abruptly. Under this situation, the  
129 flux due to bubble emission (CH<sub>4</sub> ebullition,  $B_{CH_4}$ , mg CH<sub>4</sub>·m<sup>-2</sup>·h<sup>-1</sup>) was estimated using the  
130 method described in detail by Xiao et al. (2014). Bubbles were not observed in all 48 chamber  
131 deployments during the daily campaigns. Thus, the frequency of daily CH<sub>4</sub> bubbling ( $F_{BCH_4}$ )  
132 was estimated as:

$$133 \quad F_{BCH_4} = \frac{\text{Deployments with Bubbles}}{48} \times 100\% \quad (\text{Eq.1})$$

134 The daily total CH<sub>4</sub> flux ( $T_{CH_4}$ , mg CH<sub>4</sub>·m<sup>-2</sup>·d<sup>-1</sup>) was the sum of daily total  $D_{CH_4}$  and daily  
135 total  $B_{CH_4}$ .

### 136 2.3 Model approach

137 To describe the temperature dependence of CH<sub>4</sub> fluxes, we used a modified Arrhenius  
138 equation (Aben et al., 2017):

$$139 \quad F_{CH_4} = F_{20} \times e^{b \times (T - 20)} \quad (\text{Eq.2})$$

140  $F_{CH_4}$  is the CH<sub>4</sub> flux at temperature  $T$  (°C);  $F_{20}$  and  $b$  are the empirical coefficients;  $F_{20}$  is the  
141 CH<sub>4</sub> flux at 20 °C. This model can be reorganized as a  $Q_{10}$  relationship with  $b$ :

$$142 \quad b = (\ln Q_{10}) / 10 \quad (\text{Eq.3})$$

143  $Q_{10}$  corresponds to the proportional change in the process per 10 °C change in temperature.

### 144 2.4 Other measurements

145 Air temperature ( $T_a$ , °C), air pressure ( $P_a$ , hPa), wind speed ( $w$ , m s<sup>-1</sup>) and water  
146 temperatures ( $T_w$ , °C), and chlorophyll a concentration ( $Chl-a$ , µg L<sup>-1</sup>) were measured every  
147 20 minutes during all diel field campaigns.  $T_a$ , and  $P_a$  were measured using a handheld weather  
148 meter (YGY-QXY, China).  $T_w$  was measured using a multi-parameter probe (Hydrolab DS5,



149 HACH, US). Water samples were collected at the beginning of each field campaign. These  
150 samples were used to measure the concentrations of *Chl-a*, total nitrogen (*TN*) and total  
151 phosphorus (*TP*). *Chl-a* was determined by using the national standard method (Wang et al.,  
152 2002). *TN* and *TP* were analyzed spectrophotometrically with a continuous flow autoanalyzer  
153 (Skalar Analytical, B.V., Breda, Netherlands). Wind speed was measured with a portable aero  
154 vane at 2 m height.

## 155 2.5 Statistical analysis

156 All data were checked for normality using the Kolmogorov-Smirnov test. Pearson's  
157 correlations coefficients and linear regressions were used to study the relationships between  
158 CH<sub>4</sub> flux and environmental factors. Stepwise linear regressions were performed for relevant  
159 combinations of variables. We further estimated seasonal average of variable and defined  
160 December, January and February as winter, March to May as spring, June to August as summer,  
161 and September to November as autumn.

## 162 3. Results

### 163 3.1 Variations in environmental factors

164 Diel and seasonal variations in environmental parameters are summarized in Fig.1. Wind speed  
165 was too low to be measured during most campaigns (maximum wind speed was  $< 1.5 \text{ m s}^{-1}$ )  
166 and disregarded from further analysis. Air temperature ( $T_a$ ) and water temperature ( $T_w$ ) had  
167 significant diel and seasonal changes. The diurnal variation of  $T_a$  ( $\Delta T_a$ ) was greater than that  
168 of  $T_w$  ( $\Delta T_w$ ) (Table 1). The maximum  $\Delta T_a$  (27.5°C) and  $\Delta T_w$  (10.1°C) occurred on 28  
169 February and the minimum  $\Delta T_a$  (3.4°C) and  $\Delta T_w$  (1.3°C) occurred on 20 November. The  
170 maximum daily mean air temperature ( $\overline{T_a}$ ) was 29.6°C and was recorded on 17 July, and the





171 minimum value was 5.5°C and was measured on 19 January. The extremes in the daily mean  
172 water temperatures ( $\overline{T_w}$ ), 30.5 and 8.6°C, were recorded on 29 August and 19 January (Table  
173 1). There were significant seasonal changes of air pressure ( $Pa$ ) and chlorophyll a ( $Chl-a$ ) (Fig  
174 1). The diurnal variation of air pressure ( $\Delta Pa$ ) was small. The maximum  $\Delta Pa$  occurred in 29  
175 December and the minimum in 27 October. The maximum daily mean air pressure ( $\overline{Pa}$ ) was  
176 recorded on 29 December, and the minimum value was measured on 17 July. Both diurnal and  
177 seasonal variations of chlorophyll a ( $Chl-a$ ) ranged widely (Table 1). The maximum diurnal  
178 variations of  $Chl-a$  occurred in 26 April and the minimum in 29 December. The maximum and  
179 the minimum daily mean chlorophyll a ( $\overline{Chl-a}$ ) were recorded on 29 June and 20 November,  
180 respectively ( $27.6 \mu\text{g L}^{-1}$  to  $477.7 \mu\text{g L}^{-1}$ ). With  $TN$  and  $TP$  ranging from  $1.36 \text{ mg}\cdot\text{L}^{-1}$  to  $5.3$   
181  $\text{mg}\cdot\text{L}^{-1}$  and  $0.04 \text{ mg}\cdot\text{L}^{-1}$  to  $0.86 \text{ mg}\cdot\text{L}^{-1}$ , respectively, the pond can be classified as eutrophic.  
182 Both nutrient concentrations were highest in September (Table 1).

183 We averaged environmental factors in the different seasons and found that  $T_a$ ,  $T_w$  and  $Chl-a$   
184 were the highest in summer and the lowest in winter, while  $Pa$  was the highest in winter and  
185 the lowest in summer. There were no significant differences in  $T_a$ ,  $T_w$ ,  $Pa$  and  $Chl-a$  between  
186 spring and autumn.  $TN$  and  $TP$  were highest in autumn and lowest in winter (supplemental  
187 Table 1).

### 188 3.2 CH<sub>4</sub> fluxes

#### 189 *Diffusive CH<sub>4</sub> fluxes*

190 The diffusive flux of CH<sub>4</sub> ( $D_{\text{CH}_4}$ ) from the pond showed obvious but irregular diurnal and  
191 seasonal variations (Fig 1). The maximum daily mean diffusive flux ( $\overline{D_{\text{CH}_4}}$ ) was  $0.207 \pm 0.009$   
192  $\text{mg CH}_4\cdot\text{m}^{-2}\cdot\text{h}^{-1}$  (mean  $\pm$  standard error), observed on 18 May. The minimum  $\overline{D_{\text{CH}_4}}$  ( $0.011 \pm$



193 0.001 mg CH<sub>4</sub>·m<sup>-2</sup>·h<sup>-1</sup>) was on 20 November.  $D_{\text{CH}_4}$  was highest in spring ( $0.146 \pm 0.005$  mg  
194 CH<sub>4</sub>·m<sup>-2</sup>·h<sup>-1</sup>) and lowest in winter ( $0.103 \pm 0.006$  mg CH<sub>4</sub>·m<sup>-2</sup>·h<sup>-1</sup>).  $D_{\text{CH}_4}$  in summer was higher  
195 than that in autumn. On average, the daily diffusive CH<sub>4</sub> flux of the pond in 2016 was  $2.4 \pm 0.5$   
196 mg CH<sub>4</sub>·m<sup>-2</sup>·d<sup>-1</sup> (Table 2).

197 The highest diel variability in  $D_{\text{CH}_4}$  ( $\Delta D_{\text{CH}_4}$ ) was observed on 28 February, ranged from  
198 0.083 to 0.455 mg CH<sub>4</sub>·m<sup>-2</sup>·h<sup>-1</sup>. The lowest  $\Delta D_{\text{CH}_4}$  was observed on 20 November, ranged from  
199 0.005 to 0.022 mg CH<sub>4</sub>·m<sup>-2</sup>·h<sup>-1</sup>. The peak value in 24 h was different during each diel field  
200 campaigns. Most of the highest fluxes were observed in the middle of the day or afternoon,  
201 when temperatures were higher, such as on 28 February, when  $D_{\text{CH}_4}$  peaked at 16:00 h. Some  
202 of the daily maxima occurred when temperatures began to rise rapidly, such as on 16 July, when  
203  $D_{\text{CH}_4}$  peaked at 8:30 h. Accordingly, most of the lowest diffusive fluxes occurred at night or  
204 early in the morning, when temperatures were lowest or temperatures began to decrease (Fig  
205 1).

#### 206 *CH<sub>4</sub> ebullition fluxes*

207 Ebullition mainly occurred from May to September, when CH<sub>4</sub> bubbling was not only more  
208 frequent ( $F_{\text{BCH}_4}$  exceeding 70%) but also more abundant (Fig 1). Variations of CH<sub>4</sub> ebullition  
209 were rather random and irregular. Most of the maximum CH<sub>4</sub> ebullition fluxes ( $B_{\text{CH}_4}$ ) during  
210 the daily campaign occurred between 0:00 h and 4:00 h, when temperatures were decreasing  
211 (such as on 28 February). Some of the maximum  $B_{\text{CH}_4}$  were observed in the afternoon (between  
212 15:00 h and 16:00 h), when temperatures were higher (such as on 17 July), while the maximum  
213  $B_{\text{CH}_4}$  were observed in the morning (about at 6:00 h), when temperatures were lower during  
214 other sampling campaigns (such as on 26 April). The relative frequency of occurrence of CH<sub>4</sub>



215 bubbling during the diurnal sampling campaigns ( $F_{BCH_4}$ ) ranged from 4.2% (observed on 19  
216 January and 20 November) to 97.9% (observed on 29 June) (Table 2). Daily total  $CH_4$  ebullition  
217 fluxes ranged from 0.3 (on November 20) to 319.9 (on June 29)  $mg\ CH_4 \cdot m^{-2} \cdot d^{-1}$ . On average,  
218 the daily total  $CH_4$  ebullition flux in 2016 was  $96.4 \pm 30.5\ mg\ CH_4 \cdot m^{-2} \cdot d^{-1}$ .

219 The total daily  $CH_4$  flux ( $T_{CH_4} = D_{CH_4} + B_{CH_4}$ ) ranged from 0.5 (on 20 November) to 322.7  
220 (on 29 June)  $mg\ CH_4 \cdot m^{-2} \cdot d^{-1}$ , and the mean daily  $T_{CH_4}$  was  $98.7 \pm 30.7\ mg\ CH_4 \cdot m^{-2} \cdot d^{-1}$  (Table  
221 2). The contribution of ebullition ( $B_{CH_4}$ ) to the total flux ranged from 51.8% (on 20 November)  
222 to 99.1% (on 29 June). The average daily total  $CH_4$  bubble emissions accounted for 88.6% of  
223 the total  $CH_4$  flux (Table 2).

### 224 3.3 $CH_4$ fluxes and environmental factors

225 **Correlation analysis** was conducted for  $D_{CH_4}$  and  $B_{CH_4}$  obtained from individual chamber  
226 deployments, and environmental variables sampled at sub-daily resolution (Table 3).  $D_{CH_4}$  was  
227 positively correlated ( $p < 0.01$ ) with  $T_w$ ,  $T_a$  and  $Chl-a$ , while negatively ( $p < 0.01$ ) correlated  
228 with  $Pa$  and the temperature difference between water and air ( $\Delta T = T_w - T_a$ ).  $B_{CH_4}$  was  
229 positively correlated with  $T_w$ ,  $T_a$  and  $Chl-a$ , and negatively correlated with  $Pa$ , but not  
230 significantly correlated with  $\Delta T$  ( $p = 0.372$ ). There was a significant positive correlation  
231 between  $D_{CH_4}$  and  $B_{CH_4}$  ( $p < 0.01$ ). We explored potential drivers of  $D_{CH_4}$  and  $B_{CH_4}$  using  
232 stepwise linear regressions (Table 4 and 5).  $T_a$  could explain most variations in  $D_{CH_4}$  ( $r^2 = 0.25$ ,  
233  $p < 0.001$ ) and the best multiple regression model included  $T_a$ ,  $Pa$ , and  $B_{CH_4}$ , which increased  
234 the  $r^2$  to 0.28 ( $p < 0.001$ ).  $T_w$  could explain most variations in  $B_{CH_4}$  ( $r^2 = 0.14$ ,  $p < 0.001$ ) and  
235 the best multiple regression model included  $T_w$ ,  $Chl-a$ , and  $\Delta T$  ( $r^2 = 0.20$ ,  $p < 0.001$ ).

236 Correlations between  $CH_4$  fluxes and environmental factors in different seasons were



237 analyzed (Table 3, 4 and 5). The result showed that  $T_w$  was the main factor determining  $\text{CH}_4$   
238 fluxes of the pond in autumn, while  $\text{Chl-}a$  was the main factor in summer. Moreover, the main  
239 factors determining  $\text{CH}_4$  fluxes varied slightly according to  $\text{CH}_4$  emission pathway in different  
240 season. For diffusion,  $T_a$  was the main factor in winter; while  $T_w$  and  $\text{Chl-}a$  were the main  
241 factors in spring. For ebullition,  $\text{Chl-}a$  was the main but not strong factor in winter; while the  
242  $\Delta T$  and  $T_a$  were the main factors in spring.

243 We additionally analyzed the relationships between daily total diffusive  $\text{CH}_4$  flux ( $T_{\text{DCH}_4}$ ),  
244 daily total  $\text{CH}_4$  ebullition ( $T_{\text{BCH}_4}$ ), the frequency of daily  $\text{CH}_4$  bubbling ( $F_{\text{BCH}_4}$ ) and daily mean  
245 values of environmental factors (Table 6). Daily  $T_{\text{BCH}_4}$  and  $F_{\text{BCH}_4}$  were positively correlated  
246 with each other and both were positively correlated with  $\overline{T_w}$ ,  $\overline{T_a}$  and  $\overline{\text{Chl-}a}$ , while negatively  
247 correlated with  $\overline{P_a}$ . Daily  $T_{\text{DCH}_4}$  was marginal positively correlated with  $\overline{T_w}$ ,  $\overline{T_a}$ ,  $T_{\text{BCH}_4}$  and  
248  $F_{\text{BCH}_4}$ , while negatively correlated with  $\overline{P_a}$ . Through stepwise regression, we only obtained a  
249 model for daily  $T_{\text{BCH}_4}$ :  $T_{\text{BCH}_4} = -110.47 + 10.17 \overline{T_w}$  ( $r^2 = 0.49$ ,  $p = 0.011$ ).

250 The magnitude of the diurnal variation of diffusive  $\text{CH}_4$  fluxes ( $\Delta D_{\text{CH}_4}$  is difference between  
251 maximum flux and minimum flux), daily total  $B_{\text{CH}_4}$ , the frequency of daily  $\text{CH}_4$  bubbling  
252 ( $F_{\text{BCH}_4}$ ) was analyzed with respected to the diel variation of measured parameters (see  
253 supplemental Table 2). These analyses showed that  $\Delta D_{\text{CH}_4}$  was positively correlated with  $\Delta T_w$   
254 and  $\Delta T_a$ . Through stepwise regression, the best multiple regression model for  $\Delta D_{\text{CH}_4}$  was  
255 obtained:  $\Delta D_{\text{CH}_4} = 0.01 + 0.036 \Delta T_w$  ( $r^2 = 0.63$ ,  $p < 0.001$ ).  $F_{\text{BCH}_4}$  was positively correlated  
256 with  $\Delta D_{\text{CH}_4}$ , and daily total  $B_{\text{CH}_4}$  was positively correlated with  $F_{\text{BCH}_4}$ . Although daily total  
257  $B_{\text{CH}_4}$  was not significantly correlated with  $\Delta T_w$ , we found larger ebullition rates for larger  $\Delta$   
258  $T_w$  for conditions with nearly equal water temperature. For example, the daily mean  $T_w$  on 28



259 February (16.1°C) was close to that on 25 March (16.3°C), yet  $\Delta T_w$  on 28 February was much  
260 higher (10.1°C) than that on 25 March (2.8°C). As a result, daily amount of CH<sub>4</sub> ebullition on  
261 28 February ( $T_{BCH_4}$ , 52.0 mg CH<sub>4</sub>·m<sup>-2</sup>·d<sup>-1</sup>) was obviously higher than that on 25 March (18.3  
262 mg CH<sub>4</sub>·m<sup>-2</sup>·d<sup>-1</sup>). This phenomenon was also seen on 29 December and 19 January (Table 1 and  
263 2).

#### 264 3.4 Influence of temperature on diffusion and ebullition

265 We bin-averaged gas fluxes according to the temperature difference between the surface  
266 water and air ( $\Delta T = T_w - T_a$ ) (Fig 2). The results showed that under  $\Delta T < 0$  °C, there was a  
267 significant negative linear relationship between  $D_{CH_4}$  and  $\Delta T$  ( $R^2 = 0.70$ ). While  $\Delta T$  was  
268 positive but smaller than 5 °C,  $D_{CH_4}$  increased slowly. When  $\Delta T$  was exceeding 5 °C,  $D_{CH_4}$   
269 decreased. Besides, when  $\Delta T$  was nearly zero ( $-1 < \Delta T < 1$  °C), the averaged diffusive CH<sub>4</sub>  
270 fluxes ( $0.091 \pm 0.011$  mg CH<sub>4</sub>·m<sup>-2</sup>·h<sup>-1</sup>) was not significantly different from the mean diffusive  
271 CH<sub>4</sub> flux for the entire year ( $0.098 \pm 0.019$  mg CH<sub>4</sub>·m<sup>-2</sup>·h<sup>-1</sup>). We also compared the averaged  
272 diffusive CH<sub>4</sub> fluxes under  $-1 < \Delta T < 1$  °C with daily mean diffusive CH<sub>4</sub> flux each month  
273 (See supplemental Table 3), and found that there were no significant differences between them  
274 except for 29 August.

275 CH<sub>4</sub> ebullition ( $B_{CH_4}$ ) and the frequency of CH<sub>4</sub> bubbling ( $F_{BCH_4}$ ) under different  $\Delta T$   
276 showed that when  $\Delta T$  was near zero ( $-1 < \Delta T < 1$  °C),  $F_{BCH_4}$  was about 30%, and ebullition  
277 ranged between 117 ~ 136 mg CH<sub>4</sub>·m<sup>-2</sup>·d<sup>-1</sup>, which was close to the average CH<sub>4</sub> ebullition flux  
278 ( $96.4 \pm 30.5$  mg CH<sub>4</sub>·m<sup>-2</sup>·d<sup>-1</sup>). When  $\Delta T > 1$  °C and  $\Delta T < -1$  °C,  $F_{BCH_4}$  started to increase.  
279 Meanwhile the ebullition flux increased substantially when  $1 < \Delta T < 5$  °C and  $-3 < \Delta T < -1$   
280 °C; yet when  $\Delta T > 5$  °C and  $\Delta T < -3$  °C, the bubbling flux decreased sharply (Fig. 3).



### 281 3.5 Temperature dependency of CH<sub>4</sub> fluxes

282 Temperature was the strongest predictor for seasonal variations of  $D_{\text{CH}_4}$  and  $B_{\text{CH}_4}$ . We  
283 calculated the temperature dependence of CH<sub>4</sub> fluxes in terms of  $Q_{10}$  (Fig 4). The results  
284 showed that the  $Q_{10}$  of daily total  $D_{\text{CH}_4}$  of  $\overline{T_w}$  and  $\overline{T_a}$  were 2.05 and 1.87, respectively. While  
285 the  $Q_{10}$  of daily total  $B_{\text{CH}_4}$  of  $\overline{T_w}$  and  $\overline{T_a}$  were 5.52 and 4.38, respectively.

286 We further explored  $Q_{10}$  of ebullition and diffusive emissions for a range of  $TP$   
287 concentrations (Table 7). Both ebullition and diffusion responded slightly stronger to  $T_w$  than  
288 to  $T_a$  regardless of  $TP$  concentrations. For diffusion,  $Q_{10}$  increased with  $TP$  concentration when  
289 the averaged  $TP$  was below  $0.4 \text{ mg}\cdot\text{L}^{-1}$ . For example, when the averaged  $TP$  was  $0.05 \text{ mg}\cdot\text{L}^{-1}$ ,  
290 the  $Q_{10}$  of the diffusive CH<sub>4</sub> flux for  $T_w$  and  $T_a$  were 1.29 and 1.27, respectively. When the  
291 averaged  $TP$  was  $0.4 \text{ mg}\cdot\text{L}^{-1}$ , the  $Q_{10}$  of the diffusive CH<sub>4</sub> flux to  $T_w$  and  $T_a$  increased to 7.52  
292 and 5.23, respectively. However, when averaged  $TP$  was higher than  $0.8 \text{ mg}\cdot\text{L}^{-1}$ , its  $Q_{10}$  tended  
293 to decline. For ebullition, although there was no exponential relationship when  $TP$  was  $0.2 \sim$   
294  $0.4 \text{ mg}\cdot\text{L}^{-1}$ ,  $Q_{10}$  also tended to increase with  $TP$  concentration. For example, when averaged  $TP$   
295 was  $0.05 \text{ mg}\cdot\text{L}^{-1}$ ,  $Q_{10}$  of CH<sub>4</sub> ebullition flux to  $T_w$  and  $T_a$  were 1.32 and 1.15, respectively.  
296 When averaged  $TP$  was exceeding  $0.8 \text{ mg}\cdot\text{L}^{-1}$ ,  $Q_{10}$  increased to 3.29 and 2.06, respectively.

## 297 4. Discussion

### 298 4.1 Contribution of diffusion and ebullition to total CH<sub>4</sub> emissions

299 The diffusive CH<sub>4</sub> fluxes from the studied pond were on average  $2.36 \pm 0.07 \text{ mg CH}_4\cdot\text{m}^{-2}\cdot\text{d}$   
300 <sup>1</sup>, which is close to the mean diffusive CH<sub>4</sub> fluxes of ponds and small lakes with sizes between  
301  $0.1$  and  $1 \text{ km}^2$  ( $2.56 \text{ mg CH}_4 \text{ m}^{-2}\cdot\text{d}^{-1}$ , Holgerson and Raymond, 2016). However, the diffusive  
302 CH<sub>4</sub> fluxes were lower than what has been reported. The diffusive fluxes from a shallow



303 eutrophic lake in southern Brazil, estimated from summer and winter, were 9.35 and 2.17 mg  
304  $\text{CH}_4 \text{ m}^{-2} \cdot \text{d}^{-1}$ , respectively (Palma-Silva et al., 2013). The mean diffusive flux from a tropical  
305 pond in India was 49.6 mg  $\text{CH}_4 \text{ m}^{-2} \cdot \text{d}^{-1}$  (the high diffusive flux from one pond was 324.8 mg  
306  $\text{CH}_4 \text{ m}^{-2} \cdot \text{d}^{-1}$ ) (Panneer Selvam et al., 2014). DelSontro et al. (2016) found an average diffusive  
307  $\text{CH}_4$  flux of 57.6 mg  $\text{CH}_4 \text{ m}^{-2} \cdot \text{d}^{-1}$  (from May to November) from ten shallow and vegetated  
308 beaver ponds in Canada, which was more than one order of magnitude higher than the diffusive  
309 fluxes observed in the present study.

310  $\text{CH}_4$  ebullition fluxes both in summer and winter in the study (See supplemental Table 1)  
311 ranged within the bubble  $\text{CH}_4$  emissions reported by PalmaSilva et al. (2013) from a shallow  
312 eutrophic lake in southern Brazil. The average  $\text{CH}_4$  ebullition flux in our study was  $96.4 \pm 30.5$   
313 mg  $\text{CH}_4 \cdot \text{m}^{-2} \cdot \text{d}^{-1}$ , comparable to the mean ebullition flux from the tropical region in India (112  
314 mg  $\text{m}^{-2} \cdot \text{d}^{-1}$ ) (Panneer Selvam et al., 2014), while obviously higher than the fluxes reported from  
315 lakes in northern Sweden (22.0 mg  $\text{CH}_4 \cdot \text{m}^{-2} \cdot \text{d}^{-1}$ ) (Wik et al., 2013), shallow beaver ponds in  
316 Canada (73.6 mg  $\text{CH}_4 \cdot \text{m}^{-2} \cdot \text{d}^{-1}$ ) (DelSontro et al., 2016), and eight small thaw ponds in northern  
317 Sweden (20.0 mg  $\text{CH}_4 \cdot \text{m}^{-2} \cdot \text{d}^{-1}$ ) (Burke et al., 2019), all of which are located at high latitudes.

318 The mean total  $\text{CH}_4$  flux of the pond ( $T_{\text{CH}_4}$ ) during the whole field investigations was 98.7  
319  $[0.5 - 322.7] \pm 30.7 \text{ mg} \cdot \text{CH}_4 \cdot \text{m}^{-2} \cdot \text{d}^{-1}$  (mean [range]  $\pm$  SD, Table 2), which was lower than the  
320 ponds (286.4 [3.2 - 833.6] mg  $\cdot \text{CH}_4 \cdot \text{m}^{-2} \cdot \text{d}^{-1}$ ), and higher than the lakes (64 [0.32 - 284.8]  
321 mg  $\cdot \text{CH}_4 \cdot \text{m}^{-2} \cdot \text{d}^{-1}$ ) from the tropical region in India (Panneer Selvam et al., 2014) and from a  
322 small shallow pond in Sweden (128 [52.8 - 241.6] mg  $\cdot \text{CH}_4 \cdot \text{m}^{-2} \cdot \text{d}^{-1}$ ) (Natchimuthu et al., 2014).  
323 A growing body of research has found that ebullition contributed largely to the total  $\text{CH}_4$   
324 emissions, such as on average 91 % of the total  $\text{CH}_4$  emissions from a small pond in Sweden



325 (its average depth was 1.2 m) (Natchimuthu et al., 2014), 56% from the beaver ponds in Canada  
326 (DelSontro et al., 2016), 75% from forty-five aquatic systems in the tropical region of India  
327 (Panneer Selvam et al., 2014), and 40–60 % in lakes (Bastviken et al., 2004). In our study,  
328 the average contributions of CH<sub>4</sub> ebullition to the total CH<sub>4</sub> flux was at the higher range of  
329 observations (88.6%), indicating that ebullition played a major role in CH<sub>4</sub> emissions from the  
330 shallow pond studied here. The result confirms that ebullition is an important pathway for CH<sub>4</sub>  
331 transport to the atmosphere in shallow aquatic systems, such as ponds (Casper et al., 2000;  
332 DelSontro et al., 2016). The larger importance of ebullition in shallow water can be related to  
333 the low hydrostatic pressure in the sediment (Bastviken et al., 2004), which reduces the  
334 dissolved gas concentration that is required for bubble formation.

335 Eutrophication could be a contributing factor in the relatively high contribution of ebullition  
336 to overall CH<sub>4</sub> flux in our study. The pond studied here was highly eutrophic, with *TP*, *TN* and  
337 *Chl-a* exceeding those observed for the beaver ponds in Canada (DelSontro et al., 2016).  
338 Eutrophic systems tend to accumulate more organic carbon (Anderson et al., 2014). When  
339 substrate is not limiting, there is a greater potential for CH<sub>4</sub> ebullition, thus leading to higher  
340 total CH<sub>4</sub> emissions as bubbles directly transport CH<sub>4</sub> to the atmosphere with limited exposure  
341 to oxidation (DelSontro et al., 2010).

#### 342 4.2 Influence of temperature on CH<sub>4</sub> flux

343 Many studies, including field measurements, indicated that temperature affects CH<sub>4</sub>  
344 emissions (Duc et al., 2010; Xing et al., 2005; Natchimuthu et al., 2014; Wik et al., 2014; Aben  
345 et al., 2017). In our case, both diffusive and ebullition CH<sub>4</sub> fluxes were positively correlated  
346 with *T<sub>w</sub>* and *T<sub>a</sub>*. For example, variations in *T<sub>w</sub>* explained as much as 71 % of the variation in





347 diffusion and 33 % of the variation in ebullition in autumn and variations in  $T_a$  explained 54 %  
348 of the variation in diffusion in winter. Besides, diurnal variation of  $T_w$  ( $\Delta T_w$ ) explained 63 %  
349 of the variation of the diurnal pattern of diffusive  $\text{CH}_4$  emissions ( $\Delta D_{\text{CH}_4}$ ). Altogether, our  
350 findings confirm that temperature is among the strongest predictors for  $\text{CH}_4$  emissions.  
351 Methanogenesis is highly temperature dependent (Zimov et al., 1997; Van Hulzen et al., 1999),  
352 and higher temperature results in higher  $\text{CH}_4$  production rates. In our study, the correlation  
353 between  $T_w$  and diffusive  $\text{CH}_4$  flux was almost as strong that with  $T_a$ . Yet, ebullition was more  
354 strongly correlated with  $T_w$  than  $T_a$  (Table 3 and Table 6), variations in daily  $\overline{T_w}$  explained  
355 49 % of the variation in daily total  $\text{CH}_4$  ebullition ( $p = 0.011$ ). Wik et al. (2014) determined  
356 sediment temperature to be a significant driver of ebullitive  $\text{CH}_4$  flux from shallow lakes.  
357 Although the temperature of sediment was not measured in our study, it was mainly controlled  
358 by water temperature. For shallow ponds,  $\text{CH}_4$  is mainly formed in anoxic sediments, and  
359 sediment temperature is likely to increase with air and water temperature.  $\text{CH}_4$  emissions may  
360 increase with increasing temperature due to the direct temperature effect on methanogenesis in  
361 shallow sediments (Bastviken et al., 2008). In addition, ebullition dominated the  $\text{CH}_4$  emission  
362 in our pond, which might be another reason that  $\text{CH}_4$  flux depends on the temperature. Because  
363 ebullition largely escapes methane oxidation in the system, it is more directly related to  
364 methane production rates in sediments than diffusive emissions (Natchimuthu et al., 2014;  
365 Wilkinson et al., 2015). Thus, ebullition responds more directly to  $T_w$  because of the  
366 stimulatory effects of high temperature on methanogenesis without the confounding effect of  
367 methane oxidation.

368 Convective mixing during nighttime cooling of the water column has been found to coincide



369 with pulses of CH<sub>4</sub> emissions in wetlands (Poindexter, 2016). When the difference between  
370 water and air temperature was positive, the diffusive gas fluxed can be expected to be enhanced  
371 by high gas **exchange velocities** (MacIntyre et al., 2001). In our study, when  $0 < \Delta T < 5$  °C,  
372 the diffusive CH<sub>4</sub> flux increased slowly, but CH<sub>4</sub> ebullition increased substantially, indicating  
373 that the CH<sub>4</sub> flux might be strongly enhanced due to thermal convection. However, when  $\Delta T$   
374 was exceeding 5 °C, both diffusion and ebullition tended to decrease. That time was mainly  
375 concentrated in the early morning, the temperature was usually the lowest, and lower CH<sub>4</sub> flux  
376 was mainly limited by low temperature. When  $\Delta T < -3$  °C, the bubbling flux decreased sharply,  
377 while diffusive CH<sub>4</sub> flux increased linearly, indicating that diffusion was an important pathway  
378 for CH<sub>4</sub> transport to the atmosphere when the weather was sunny, and air temperature increased  
379 more quickly than water temperature. Furthermore, when air temperature was close to water  
380 temperature, diffusive fluxes and ebullition were close to their long-term mean values.

#### 381 4.3 Effects of eutrophication on temperature dependence of CH<sub>4</sub> fluxes

382 We calculated the temperature dependence of CH<sub>4</sub> fluxes in terms of the temperature  
383 coefficient  $Q_{10}$ , which was defined by DelSontro et al. (2016) as an “ecosystem-level”  $Q_{10}$ ,  
384 representing the combining effects of multiple biotic and abiotic factors.  $Q_{10}$  values in beaver  
385 ponds varied slightly according to CH<sub>4</sub> emission pathway and bubbling appeared to be more  
386 sensitive to temperature than the diffusive pathway (DelSontro et al., 2016). In our study, the  
387  $Q_{10}$  of CH<sub>4</sub> diffusion in respect to  $\overline{T_w}$  and  $\overline{T_a}$  were 2.05 and 1.87, respectively; while the  $Q_{10}$   
388 of CH<sub>4</sub> ebullition of  $\overline{T_w}$  and  $\overline{T_a}$  were 5.52 and 4.38, respectively. Our values were  
389 comparable to those estimated for subtropical and temperate eutrophic city ponds ( $Q_{10}$  ranged  
390 from 1.63 ~ 6.73) (Aben et al., 2017). In contrast to the beaver ponds in Canada, whose average



391  $Q_{10}$  values for ebullition and diffusion fluxes to sediment temperature were 13 and 10,  
392 respectively (DelSontro et al., 2016), our  $Q_{10}$  values were lower. Our study also showed that  
393 there was a higher temperature sensitivity of bubbling from the ponds, compared to diffusive  
394 fluxes. The reason could be due to its very shallow nature and shallow sediment layer, which  
395 could cause frequent ebullition and thus promote a more erratic ebullition versus temperature  
396 pattern (Wik et al., 2018).

397 The strong temperature dependence of  $\text{CH}_4$  fluxes in our study might be related to its higher  
398 productivity. High nutrient concentration promotes the productivity and algal growth (West et  
399 al., 2012). The study from the beaver ponds in Canada showed that the temperature dependence  
400 of  $\text{CH}_4$  fluxes increased with  $TP$ , and the temperature dependence of ebullition was  
401 disproportionately enhanced by ecosystem productivity relative to diffusion (DelSontro et al.,  
402 2016). The authors pointed out that as system productivity and the supply of organic matter  
403 increased, the  $\text{CH}_4$  production was increasingly regulated by temperature (DelSontro et al.,  
404 2016). A mesocosm-based study in shallow aquatic systems revealed synergistic effect from  
405 combination of nutrient enrichment and experimental warming, causing an increasing mean  
406 annual ebullition rate; while the diffusive flux remained unaffected by nutrient enrichment but  
407 had a largely positive response to temperature treatment (Davidson, 2018). In our case,  $Q_{10}$  of  
408 both ebullitive and diffusive fluxes increased with system  $TP$  within a certain  $TP$  range.  
409 However, the temperature dependence of diffusive fluxes was more sensitive to ecosystem  
410 productivity when compared to ebullition. A likely reason for this may be the low frequency of  
411 bubbles, which needs more work to be verified.

## 412 **5. Conclusions**



413 The subtropical, shallow, small and eutrophic pond emitted on average  $98.7 \pm 30.7 \text{ mg} \cdot \text{m}^{-2} \cdot \text{d}^{-1}$  of  $\text{CH}_4$ . Ebullition was quantitatively most important, accounting for 51.8% to 99.1% of  
414  
415 the total  $\text{CH}_4$  emission. A positive correlation between temperature and  $\text{CH}_4$  fluxes shows that  
416 there are likely positive feedbacks of aquatic  $\text{CH}_4$  fluxes to global warming. The temperature  
417 dependence of the  $\text{CH}_4$  fluxes increased with increasing nutrient concentration. By combing  
418 these facts, we conclude that the increasing cultural eutrophication and global warming  
419 promote increasing atmospheric  $\text{CH}_4$  emissions from these vastly abundant aquatic  
420 ecosystems.

#### 421 6. Data availability

422 The data published in this contribution can be accessed by email request to the corresponding  
423 author.

#### 424 7. Author contribution

425 In this work, W.L.Z analyzed the data and wrote the article, S.B.X designed the experiment,  
426 H.X, J.L and D.L performed the experiment, and A.L revised the article.

#### 427 8. Competing interests

428 The authors declare that they have no conflict of interest.

#### 429 Acknowledgements

430 This work was financially supported by the National Science Foundation of China (No.  
431 41273110), Natural Science Foundation of Hubei Province, China (2014CFB672), and Hubei  
432 Provincial Department of Education Scientific research projects (Q20151209). The Hubei  
433 province Chutian Scholar program (granted to AL) provided additionally financial support for  
434 this study. We thank Li Long and Junwei Zhang for their help with fieldwork.



435 **References**

- 436 Aben, R. C. H., Barros, N., Donk, E. V., Frenken, T., Hilt, S., Kazanjian, G., Lamers, L. P. M.,  
437 Peeters, E. T. H. M., Roelofs, J. G. M., Domis, L. N. d. S., Stephan, S., Velthuis, M.,  
438 Van de Waal, D. B., Wik, M., Thornton B. F., Wilkinson, J., DelSontro, T., and Kosten,  
439 S.: Cross continental increase in methane ebullition under climate change., *Nature*  
440 *communications*, 8, [https://doi.org/ 10.1038/s41467-017-01535-y](https://doi.org/10.1038/s41467-017-01535-y), 2017.
- 441 Anderson, N. J., Bennion, H., and Lotter, A. F.: Lake eutrophication and its implications for  
442 organic carbon sequestration in Europe, *Glob Chang Biol*, 20, 2741-2751,  
443 [https://doi.org/ 10.1111/gcb.12584](https://doi.org/10.1111/gcb.12584), 2014.
- 444 Bastviken, D., Cole, J., Pace, M., and Tranvik, L.: Methane emissions from lakes: Dependence  
445 of lake characteristics, two regional assessments, and a global estimate, *Global*  
446 *Biogeochemical Cycles*, 18, [https://doi.org/ 10.1029/2004GB002238](https://doi.org/10.1029/2004GB002238), 2004.
- 447 Bastviken, D., Cole, J. J., Pace, M. L., and Van de Bogert, M. C.: Fates of methane from  
448 different lake habitats: Connecting whole-lake budgets and CH<sub>4</sub> emissions, *Journal of*  
449 *Geophysical Research*, 113, [https://doi.org/ 10.1029/2007JG000608](https://doi.org/10.1029/2007JG000608), 2008.
- 450 Bastviken, D., Tranvik, L. J., Downing, J. A., Crill, P. M., and Enrich-Prast, A.: Freshwater  
451 Methane Emissions Offset the Continental Carbon Sink, *Science*, 331, 50-50,  
452 [https://doi.org/ 10.1126/science.1196808](https://doi.org/10.1126/science.1196808), 2011.
- 453 Burger, M., Berger, S., Spangenberg, I., and Blodau, C.: Summer fluxes of methane and carbon  
454 dioxide from a pond and floating mat in a continental Canadian peatland,  
455 *Biogeosciences*, 13, 3777–3791. [https://doi.org/ 10.5194/bg-13-3777-2016](https://doi.org/10.5194/bg-13-3777-2016), 2016.
- 456 Burke, S. A., Wik, M., Lang, A., Contosta, A. R., Palace, M., Crill, P. M., and Varner, R. K.:

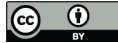

- 457 Long - Term Measurements of Methane Ebullition From Thaw Ponds, Journal of  
458 Geophysical Research: Biogeosciences, 124, 14, [https://doi.org/](https://doi.org/10.1029/2018jg004786)  
459 10.1029/2018jg004786, 2019.
- 460 Casper, P., Maberly, S. C., Hall, G. H., and Finlay, P. J.: Fluxes of methane and carbon dioxide  
461 from a small productive lake to the atmosphere, Biogeochemistry, 49, 1-19,  
462 [https://doi.org/ 10.2307/1469408](https://doi.org/10.2307/1469408), 2000.
- 463 Davidson, T. A., Audet, J., Svenning, J.-C., Lauridsen, T. L., Søndergaard, M., Landkildehus,  
464 F., Larsen, S. E., and Jeppesen, E.: Eutrophication effects on greenhouse gas fluxes  
465 from shallow-lake mesocosms override those of climate warming, Global Change  
466 Biology, 21, <https://doi.org/10.1111/gcb.13062>, 2015.
- 467 Davidson, T. A., Audet J., Jeppesen E., Landkildehus F., Lauridsen T. L., Søndergaard M. and  
468 Syväranta J.: Synergy between nutrients and warming enhances methane ebullition  
469 from experimental lakes, Nature Climate Change, 8, 5, [https://doi.org/10.1038/s41558-](https://doi.org/10.1038/s41558-017-0063-z)  
470 017-0063-z, 2018.
- 471 DelSontro, T., McGinnis, D. F., Sobek, S., Ostrovsky, I., and Wehrli, B.: Extreme Methane  
472 Emissions from a Swiss Hydropower Reservoir: Contribution from Bubbling  
473 Sediments, Environmental Science & Technology, 44, 2419-2425,  
474 <https://doi.org/10.1021/es9031369>, 2010.
- 475 DelSontro, T., Boutet, L., St-Pierre, A., del Giorgio, P. A., and Prairie, Y. T.: Methane ebullition  
476 and diffusion from northern ponds and lakes regulated by the interaction between  
477 temperature and system productivity, Limnology and Oceanography, 61, S62-S77,  
478 [https://doi.org/ 10.1002/lno.10335](https://doi.org/10.1002/lno.10335), 2016.



- 479 Downing, J. A., Prairie, Y. T., Cole, J. J., Duarte, C. M., Tranvik, L. J., Striegl, R. G., McDowell,  
480 W. H., Kortelainen, P., Caraco, N. F., Melack, J. M., and Middelburg, J. J.: The global  
481 abundance and size distribution of lakes, ponds, and impoundments, *Limnology and*  
482 *Oceanography Methods*, 51, 2388-2397, <https://doi.org/10.4319/lo.2006.51.5.2388>,  
483 2006.
- 484 Downing, J. A., Cole, J. J., Middelburg, J. J., Striegl, R. G., Duarte, C. M., Kortelainen, P.,  
485 Prairie, Y. T., and Laube, K. A.: Sediment organic carbon burial in agriculturally  
486 eutrophic impoundments over the last century, *Global Biogeochemical Cycles*, 22,  
487 <https://doi.org/10.1029/2006gb002854>, 2008.
- 488 Duc, N., Crill, P., and Bastviken, D.: Implications of temperature and sediment characteristics  
489 on methane formation and oxidation in lake sediments, *Biogeochemistry*, 100, 185-196,  
490 <https://doi.org/10.1007/s10533-010-9415-8>, 2010.
- 491 Hamilton, J. D., and Kelly, C. A.: Flux to the atmosphere of CH<sub>4</sub> and from wetland ponds on  
492 the Hudson Bay lowlands (HBLs), *Journal of geophysical research*, 99, 16,  
493 [https://doi.org/10.1029\\_93JD03020](https://doi.org/10.1029_93JD03020), 1994.
- 494 Hanson, P. C., Carpenter, S. R., A., C. J., and Winslow, L. A.: Small lakes dominate a random  
495 sample of regional lake characteristics, *Freshwater Biology*, 52, 9,  
496 <https://doi.org/10.1111/j.1365-2427.2007.01730.x>, 2007.
- 497 Holgerson, M. A.: Drivers of carbon dioxide and methane supersaturation in small, temporary  
498 ponds, *Biogeochemistry*, 124, 305-318, <https://doi.org/10.1007/s10533-015-0099-y>,  
499 2015.
- 500 Holgerson, M. A., and Raymond, P. A.: Large contribution to inland water CO<sub>2</sub> and CH<sub>4</sub>



501 emissions from very small ponds, *Nature Geoscience*, 9, 222-226,  
502 <https://doi.org/10.1038/ngeo2654>, 2016.

503 Houghton, J. T., Ding, Y., Griggs, D. J., Noguer, M., van der Linden, P. J., Dai, X., Maskell, K.,  
504 and Johnson, C. A.: IPCC 2001, *Climate Change 2001: The Scientific Basis*, University  
505 Press Cambridge, 2001.

506 IPCC: *Climate Change 2014: Synthesis Report. Contribution of Working Groups I, II and III*  
507 *to the Fifth Assessment Report of the Intergovernmental Panel on Climate Change*  
508 [Core Writing Team, R.K. Pachauri and L.A. Meyer (eds.)]. IPCC, 151, 2014.

509 Kankaala, P., Huotari, J., Tilonen, T., and Ojala, A.: Lake-size dependent physical forcing  
510 drives carbon dioxide and methane effluxes from lakes in a boreal landscape,  
511 *Limnology and Oceanography*, 58, 1915–1930, [https://doi.org/](https://doi.org/10.4319/lo.2013.58.6.1915)  
512 [10.4319/lo.2013.58.6.1915](https://doi.org/10.4319/lo.2013.58.6.1915), 2013.

513 Kirschke, S., Bousquet, P., Ciais, P., Saunois, M., Canadell, J. G., Dlugokencky, E. J.,  
514 Bergamaschi, P., Bergmann, D., Blake, D. R., Bruhwiler, L., Cameron-Smith, P.,  
515 Castaldi, S., Chevallier, F., Feng, L., Fraser, A., Heimann, M., Hodson, E. L.,  
516 Houweling, S., Josse, B., Fraser, P. J., Krummel, P. B., Lamarque, J.-F., Langenfelds,  
517 R. L., Le Quéré, C., Naik, V., O’Doherty, S., Palmer, P. I., Pison, I., Plummer, D.,  
518 Poulter, B., Prinn, R. G., Rigby, M., Ringeval, B., Santini, M., Schmidt, M., Shindell,  
519 D. T., Simpson, I. J., Spahni, R., Steele, L. P., Strode, S. A., Sudo, K., Szopa, S., van  
520 der Werf, G. R., Voulgarakis, A., van Weele, M., Weiss, R. F., Williams, J. E., and Zeng,  
521 G.: Three decades of global methane sources and sinks, *Nature geoscience*, 6, 813–823,  
522 [https://doi.org/ 10.1038/NGEO1955](https://doi.org/10.1038/NGEO1955), 2013.





- 523 Lambert, M., and Fréchet, J.: Analytical techniques for measuring fluxes of CO<sub>2</sub> and CH<sub>4</sub>  
524 from hydroelectric reservoirs and natural water bodies, in: Greenhouse Gas  
525 Emissions—Fluxes and Processes: Hydroelectric Reservoirs and Natural Environments,  
526 edited by: Tremblay, A., Varfalvy, L., Roehm, C., and Garneau, M., Springer, Berlin,  
527 37-60, 2005.
- 528 Louergue, L., Schilt, A., Spahni, R., Masson-Delmotte, V. r., Blunier, T., Lemieux, B. n. d.,  
529 Barnola, J.-M., Raynaud, D., Stocker, T. F., and Chappellaz, J. r. m.: Orbital and  
530 millennial-scale features of atmospheric CH<sub>4</sub> over the past 800,000 years, Nature letters,  
531 453, 383–386, <https://doi.org/10.1038/nature06950>, 2008.
- 532 Lundin, E. J. , Giesler, R. , Persson, A. , Thompson, M. S. , and Karlsson, J. : Integrating carbon  
533 emissions from lakes and streams in a subarctic catchment. Journal of Geophysical  
534 Research: Biogeocences, 118, 3, <https://doi.org/10.1002/jgrg.20092>, 2013.
- 535 MacIntyre, S., Eugster, W., and Kling, G. W.: The critical importance of buoyancy flux for gas  
536 flux across the air-water interface, AGU Geophysical Monograph, 127, 5, 135–139,  
537 <https://doi.org/10.1029/GM127p0135>, 2001.
- 538 Natchimuthu, S., Panneer Selvam, B., and Bastviken, D.: Influence of weather variables on  
539 methane and carbon dioxide flux from a shallow pond, Biogeochemistry, 119, 403–413,  
540 <https://doi.org/10.1007/s10533-014-9976-z>, 2014.
- 541 Palma-Silva, C., Marinho, C. C., Albertoni, E. F., Giacomini, I. B., Figueiredo Barros, M. P.,  
542 Furlanetto, L. M., Trindade, C. R. T., and Esteves, F. d. A.: Methane emissions in two  
543 small shallow neotropical lakes: The role of temperature and trophic level, Atmospheric  
544 Environment, 81, 373-379, <http://dx.doi.org/10.1016/j.atmosenv.2013.09.029>, 2013.



- 545 Panneer Selvam, B., Natchimuthu, S., Arunachalam, L., and Bastviken, D.: Methane and  
546 carbon dioxide emissions from inland waters in India – implications for large scale  
547 greenhouse gas balances, *Global Change Biology*, 20, 3397-3407,  
548 <https://doi.org/10.1111/gcb.12575>, 2014.
- 549 Peixoto, R. B., Machado-Silva, F., Marotta, H., Enrich-Prast, A., and Bastviken, D.: Spatial  
550 versus day-to-day within lake variability in tropical floodplain lake CH<sub>4</sub> emissions—  
551 developing optimized approaches to representative flux measurements, *PLoS One*, 10,  
552 <https://doi.org/10.1371/journal.pone.0123319>., 2015.
- 553 Poindexter, C. M., D. D. Baldocchi, J. H. Matthes, S. H. Knox, and E. A. Variano.: The  
554 contribution of an overlooked transport process to a wetland's methane emissions,  
555 *Geophys. Res. Lett.*, 43, 9, <https://doi.org/10.1002/2016GL068782>, 2016.
- 556 Rasilo, T., Prairie, Y. T., and Del Giorgio, P. A.: Large-scale patterns in summer diffusive CH<sub>4</sub>  
557 fluxes across boreal lakes, and contribution to diffusive C emissions, *Global Change*  
558 *Biology*, 21, 16, <https://doi.org/10.1111/gcb.12741>, 2015.
- 559 Van Hulzen, J. B., Segers, R., van Bodegom, P. M., and Leffelaar, P. A.: Temperature effects  
560 on soil methane production: an explanation for observed variability, *Soil Biology &*  
561 *biochemistry*, 31, 1919–1929. [https://doi.org/10.1016/s0038-0717\(99\)00109-1](https://doi.org/10.1016/s0038-0717(99)00109-1), 1999.
- 562 Wang, X. F., Wei, F. S., and Qi, W. Q.: *Monitoring and Analysis Methods of Water and*  
563 *Wastewater (the fourth edition)*. China Environmental Science Press, Beijing (in  
564 Chinese), 2002.
- 565 West, W. E., Coloso, J. J., and Jones, S. E.: Effects of algal and terrestrial carbon on methane  
566 production rates and methanogen community structure in a temperate lake sediment,



- 567 Freshwater Biology, 57, 949-955, <https://doi.org/10.1111/j.1365-2427.2012.02755.x>,
- 568 2012.
- 569 West, W. E., Creamer, K. P., and Jones, S. E.: Productivity and depth regulate lake contributions
- 570 to atmospheric methane, *Limnology and Oceanography*, 61, S51-S61,
- 571 <https://doi.org/10.1002/lno.10247>, 2016.
- 572 Wik, M., Crill, P. M., Varner, R. K., and Bastviken, D.: Multiyear measurements of ebullitive
- 573 methane flux from three subarctic lakes, *Journal of Geophysical Research:*
- 574 *Biogeosciences*, 118, 1307-1321, <https://doi.org/10.1002/jgrg.20103>, 2013.
- 575 Wik, M., Thornton, B. F., Bastviken, D., MacIntyre, S., Varner, R. K., and Crill, P. M.: Energy
- 576 input is primary controller of methane bubbling in subarctic lakes, *Geophysical*
- 577 *Research Letters*, 41, 555-560, <https://doi.org/10.1002/2013gl058510>, 2014.
- 578 Wik, M., Thornton, B. F., Bastviken, D., Uhlbäck, J., and Crill, P. M.: Biased sampling of
- 579 methane release from northern lakes: A problem for extrapolation, *Geophysical*
- 580 *Research Letters*, 43, 7, <https://doi.org/10.1002/2015GL066501>, 2016a.
- 581 Wik, M., Varner, R. K., Anthony, K. W., MacIntyre, S., and Bastviken, D.: Climate-sensitive
- 582 northern lakes and ponds are critical components of methane release, *Nature geoscience*
- 583 9, 7, <https://doi.org/10.1038/NGEO2578>, 2016b.
- 584 Wik, M., Johnson, J. E., Crill, P. M., DeStasio, J. P., Erickson, L., Halloran, M. J., Fahnestock,
- 585 M. F., Crawford, M. K., Phillips, S. C., and Varner, R. K.: Sediment Characteristics and
- 586 Methane Ebullition in Three Subarctic Lakes, *Journal of Geophysical Research:*
- 587 *Biogeosciences*, 123, 2399-2411, <https://doi.org/10.1029/2017jg004298>, 2018.
- 588 Wilkinson, J., Maeck, A., Alshboul, Z., and Lorke, A.: Continuous Seasonal River Ebullition



589           Measurements Linked to Sediment Methane Formation, *Environmental Science &*  
590           *Technology*, 49, 13121-13129, <https://doi.org/10.1021/acs.est.5b01525>, 2015.

591   Xiao, S., Yang, H., Liu, D., Zhang, C., Lei, D., Wang, Y., Peng, F., Li, Y., Wang, C., Li, X., Wu,  
592           G., and Liu, L.: Gas transfer velocities of methane and carbon dioxide in a subtropical  
593           shallow pond, *Tellus B: Chemical and Physical Meteorology*, 66, 23795,  
594           <https://doi.org/10.3402/tellusb.v66.23795>, 2014.

595   Xing, Y., Xie, P., Yang, H., Ni, L., Wang, Y., and Rong, K.: Methane and carbon dioxide fluxes  
596           from a shallow hypereutrophic subtropical Lake in China, *Atmospheric Environment*,  
597           39, 5532-5540, <https://doi.org/10.1016/j.atmosenv.2005.06.010>, 2005.

598   Zimov, S. A., Voropaev, Y. V., Semiletov, I. P., Davidov, S. P., Prosiannikov, S. F., Chapin, I. F.  
599           S., Chapin, M. C., Trumbore, S., and Tyler, S.: North Siberian Lakes: a methane source  
600           fueled by Pleistocene carbon, *Sciences*, 227, 800-802,  
601           <https://www.jstor.org/stable/2893123>, 1997.  
602



603 Table 1 Daily averaged and diurnal variation of physical and chemical characteristics for each  
 604 sampling date. Daily mean air temperature ( $\overline{T_a}$ ), daily mean water temperatures ( $\overline{T_w}$ ), daily  
 605 mean air pressure ( $\overline{P_a}$ ), daily mean chlorophyll a ( $\overline{Chl-a}$ ), diurnal variation of  $T_a$  ( $\Delta T_a$ ),  
 606 diurnal variation of  $T_w$  ( $\Delta T_w$ ), diurnal variation of air pressure ( $\Delta P_a$ ), diurnal variation of  
 607 chlorophyll a ( $\Delta Chl-a$ ), daily mean total nitrogen ( $\overline{TN}$ ) and daily mean total phosphorus ( $\overline{TP}$ ).

608 Note: TN and TP were invalid on 29 December.

609

| Date   | $\overline{T_a}$<br>(°C) | $\overline{T_w}$<br>(°C) | $\overline{P_a}$<br>(hPa) | $\overline{Chl-a}$<br>( $\mu\text{g L}^{-1}$ ) | $\Delta T_a$<br>(°C) | $\Delta T_w$<br>(°C) | $\Delta P_a$<br>(hPa) | $\Delta Chl-a$<br>( $\mu\text{g L}^{-1}$ ) | $\overline{TP}$<br>( $\text{mg L}^{-1}$ ) | $\overline{TN}$<br>( $\text{mg L}^{-1}$ ) |
|--------|--------------------------|--------------------------|---------------------------|------------------------------------------------|----------------------|----------------------|-----------------------|--------------------------------------------|-------------------------------------------|-------------------------------------------|
| Jan 19 | 5.5                      | 8.6                      | 1019                      | 181.3                                          | 4.8                  | 1.3                  | 5.1                   | 143                                        | 0.04                                      | 2.13                                      |
| Feb 28 | 15.8                     | 16.1                     | 1013                      | 96.9                                           | 27.5                 | 10.1                 | 6.9                   | 81                                         | 0.04                                      | 2.13                                      |
| Mar 25 | 12.8                     | 16.3                     | 1020                      | 180.6                                          | 15.0                 | 2.8                  | 4.3                   | 134                                        | 0.13                                      | 2.98                                      |
| Apr 26 | 19.3                     | 21.2                     | 1003                      | 311.6                                          | 6.1                  | 2.2                  | 3.0                   | 1091                                       | 0.22                                      | 2.49                                      |
| May 18 | 22.7                     | 24.8                     | 1003                      | 256.7                                          | 12.9                 | 3.8                  | 3.5                   | 564                                        | 0.33                                      | 3.34                                      |
| Jun 29 | 24.9                     | 26.5                     | 998                       | 477.7                                          | 10.1                 | 3.8                  | 3.1                   | 663                                        | 0.10                                      | 2.81                                      |
| Jul 17 | 29.6                     | 29.4                     | 995                       | 211.2                                          | 9.5                  | 5.7                  | 4.0                   | 366                                        | 0.07                                      | 1.36                                      |
| Aug 29 | 25.8                     | 30.5                     | 1003                      | 181.1                                          | 15.0                 | 7.4                  | 3.9                   | 341                                        | 0.34                                      | 3.39                                      |
| Sep 24 | 26.3                     | 26.2                     | 1003                      | 420.6                                          | 9.7                  | 3.3                  | 3.5                   | 567                                        | 0.86                                      | 5.30                                      |
| Oct 27 | 15.6                     | 17.8                     | 1010                      | 261.5                                          | 4.3                  | 1.6                  | 2.9                   | 261                                        | 0.86                                      | 5.30                                      |
| Nov 20 | 16.2                     | 16.9                     | 1009                      | 27.6                                           | 3.4                  | 1.3                  | 6.4                   | 76                                         | 0.56                                      | 4.09                                      |
| Dec 29 | 5.7                      | 9.5                      | 1024                      | 53.9                                           | 14.6                 | 4.2                  | 9.4                   | 61                                         | ----                                      | ----                                      |

610

611

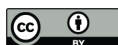

612 Table 2 Daily total diffusive CH<sub>4</sub> flux ( $T_{DCH_4}$ ), diel variability in  $D_{CH_4}$  ( $\Delta D_{CH_4}$ ),  
 613 frequency of daily CH<sub>4</sub> bubbling ( $F_{BCH_4}$ ), daily total CH<sub>4</sub> ebullition flux ( $T_{BCH_4}$ ),  
 614 and daily total CH<sub>4</sub> flux ( $T_{CH_4}$ ) for all sampling campaigns. Bold letters indicated  
 615 larger ebullition rates for larger  $\Delta T_w$  for conditions with nearly equal water  
 616 temperature.  
 617

| Date   | $\Delta D_{CH_4}$<br>(mg·m <sup>-2</sup> ·d <sup>-1</sup> ) | $T_{DCH_4}$<br>(mg·m <sup>-2</sup> ·d <sup>-1</sup> ) | $F_{BCH_4}$<br>(%) | $T_{BCH_4}$<br>(mg·m <sup>-2</sup> ·d <sup>-1</sup> ) | $T_{CH_4}$<br>(mg·m <sup>-2</sup> ·d <sup>-1</sup> ) | $T_{BCH_4}/T_{CH_4}$<br>(%) |
|--------|-------------------------------------------------------------|-------------------------------------------------------|--------------------|-------------------------------------------------------|------------------------------------------------------|-----------------------------|
| Dec 29 | 0.03                                                        | 0.5                                                   | 39.6               | 43.6                                                  | 44.2                                                 | 98.8                        |
| Jan 19 | 0.07                                                        | 1.8                                                   | 4.2                | 3.8                                                   | 5.6                                                  | 67.8                        |
| Feb 28 | 0.37                                                        | 4.1                                                   | 45.8               | 52.0                                                  | 56.1                                                 | 92.6                        |
| Mar 25 | 0.09                                                        | 1.5                                                   | 12.5               | 18.3                                                  | 19.8                                                 | 92.4                        |
| Apr 26 | 0.12                                                        | 2.8                                                   | 10.4               | 6.8                                                   | 9.6                                                  | 71.1                        |
| May 18 | 0.33                                                        | 5.0                                                   | 89.6               | 235.2                                                 | 240.2                                                | 97.9                        |
| Jun 29 | 0.17                                                        | 2.7                                                   | 97.9               | 319.9                                                 | 322.7                                                | 99.1                        |
| Jul 17 | 0.18                                                        | 3.2                                                   | 72.9               | 134.5                                                 | 137.8                                                | 97.6                        |
| Aug 29 | 0.27                                                        | 4.2                                                   | 70.8               | 149.4                                                 | 156.7                                                | 97.2                        |
| Sep 24 | 0.15                                                        | 1.7                                                   | 93.8               | 174.5                                                 | 176.3                                                | 99.0                        |
| Oct 27 | 0.02                                                        | 0.4                                                   | 27.1               | 17.9                                                  | 18.3                                                 | 97.8                        |
| Nov 20 | 0.02                                                        | 0.3                                                   | 4.2                | 0.3                                                   | 0.5                                                  | 51.8                        |
| All    | 0.2                                                         | 2.4±0.5                                               | 47.4               | 96.4 ± 30.5                                           | 98.7 ± 30.7                                          | 88.6                        |

618  
 619



620

621 Table 3 Correlations coefficients among diffusive ( $D_{CH_4}$ ,  $mg \cdot m^{-2} \cdot d^{-1}$ ) and ebullition  
 622 ( $B_{CH_4}$ ,  $mg \cdot m^{-2} \cdot d^{-1}$ ) fluxes observed during individual chamber deployments (576  
 623 deployments in total) and environmental variables these variables (water temperatures  
 624 ( $T_w$ , °C), air temperature ( $T_a$ , °C), chlorophyll a concentration ( $Chl-a$ ,  $\mu g L^{-1}$ ), air  
 625 pressure ( $P_a$ , hPa), the temperature difference between water and air ( $\Delta T = T_w -$   
 626  $T_a$ , °C) ). Correlations are presented for all data and grouped by season.

627

|          | CH <sub>4</sub> flux        | T <sub>w</sub> | T <sub>a</sub> | Chl-a    | P <sub>a</sub> | Δ T      | B <sub>CH<sub>4</sub></sub> |
|----------|-----------------------------|----------------|----------------|----------|----------------|----------|-----------------------------|
| All data | D <sub>CH<sub>4</sub></sub> | 0.492**        | 0.499**        | 0.114**  | -0.242**       | -0.199** | 0.224**                     |
|          | B <sub>CH<sub>4</sub></sub> | 0.372**        | 0.294**        | 0.350**  | -0.118**       | 0.042    |                             |
| Spring   | D <sub>CH<sub>4</sub></sub> | 0.679**        | 0.584**        | 0.171*   | -0.640**       | -0.161   | 0.413**                     |
|          | B <sub>CH<sub>4</sub></sub> | 0.400**        | 0.223**        | 0.125    | -0.269**       | 0.104    |                             |
| Summer   | D <sub>CH<sub>4</sub></sub> | 0.379**        | 0.319**        | -0.446** | -0.246**       | -0.053   | -0.199*                     |
|          | B <sub>CH<sub>4</sub></sub> | -0.194*        | -0.258**       | 0.356**  | 0.078          | 0.104    |                             |
| Autumn   | D <sub>CH<sub>4</sub></sub> | 0.844**        | 0.818**        | 0.662**  | -0.760**       | -0.412** | 0.527**                     |
|          | B <sub>CH<sub>4</sub></sub> | 0.577**        | 0.558**        | 0.463**  | -0.507**       | -0.276** |                             |
| Winter   | D <sub>CH<sub>4</sub></sub> | 0.726**        | 0.733**        | 0.024    | -0.725**       | -0.591** | 0.007                       |
|          | B <sub>CH<sub>4</sub></sub> | 0.133          | 0.243**        | -0.011   | -0.141         | -0.133   |                             |

628

629 \*\*denotes a significant correlation at the 0.01 level; \* denotes a significant correlation  
 630 at the 0.05 level

631



632 Table 4 Stepwise regressions between diffusive flux of CH<sub>4</sub> ( $D_{CH_4}$ , mg·m<sup>-2</sup>·d<sup>-1</sup>),  
 633 and CH<sub>4</sub> ebullition fluxes ( $B_{CH_4}$ , mg·m<sup>-2</sup>·d<sup>-1</sup>), air temperature ( $T_a$ , °C), water  
 634 temperature ( $T_w$ , °C), the temperature difference between water and air ( $\Delta T =$   
 635  $T_w - T_a$ , °C), air pressure ( $P_a$ , hPa) and chlorophyll a concentration ( $Chl-a$ , µg  
 636 L<sup>-1</sup>).

637

| Dependent variable | Independent variable         | Intercept | Slope                         | r <sup>2</sup> | p      |
|--------------------|------------------------------|-----------|-------------------------------|----------------|--------|
| All data           |                              |           |                               |                |        |
| $D_{CH_4}$         | Ta                           | 0.02      | 0.004                         | 0.25           | <0.001 |
|                    | Ta + Pa                      | 0.07      | 0.004 - 0.00005               | 0.27           | <0.001 |
|                    | Ta + Pa + $B_{CH_4}$         | 0.07      | 0.004 - 0.00005 + 0.001       | 0.28           | <0.001 |
| Spring             |                              |           |                               |                |        |
| $D_{CH_4}$         | Pa                           | 7.81      | -0.008                        | 0.28           | <0.001 |
|                    | Pa + Chl-a                   | 6.87      | -0.007 + 0.000                | 0.43           | <0.001 |
|                    | Pa + Chl-a + $T_w$           | -2.17     | 0.002 + 0.000 + 0.019         | 0.52           | <0.001 |
|                    | Chl-a + $T_w$                | -2.45     | 0.000 + 0.016                 | 0.52           | <0.001 |
| Summer             |                              |           |                               |                |        |
| $D_{CH_4}$         | Chl-a                        | 0.18      | 0.000                         | 0.20           | <0.001 |
|                    | Chl-a + $T_w$                | 0.08      | -0.0001 + 0.003               | 0.23           | <0.001 |
| Autumn             |                              |           |                               |                |        |
| $D_{CH_4}$         | $T_w$                        | -0.10     | 0.007                         | 0.71           | <0.001 |
| Winter             |                              |           |                               |                |        |
| $D_{CH_4}$         | Ta                           | 0.02      | 0.007                         | 0.54           | <0.001 |
|                    | Ta + Pa                      | 6.05      | 0.004 - 0.006                 | 0.63           | <0.001 |
|                    | Ta + Pa + $B_{CH_4}$         | 6.21      | 0.004 - 0.006 - 0.003         | 0.64           | <0.001 |
|                    | Ta + Pa + $B_{CH_4}$ + Chl-a | 7.58      | 0.004 - 0.007 - 0.003 + 0.000 | 0.65           | <0.001 |

638

639





640

641 Table 5 Stepwise regressions between CH<sub>4</sub> ebullition fluxes ( $B_{CH_4}$ , mg·m<sup>-2</sup>·d<sup>-1</sup>) and  
 642 diffusive flux of CH<sub>4</sub> ( $D_{CH_4}$ , mg·m<sup>-2</sup>·d<sup>-1</sup>), air temperature ( $T_a$ , °C), water temperature  
 643 ( $T_w$ , °C), the temperature difference between water and air ( $\Delta T = T_w - T_a$ , °C), air  
 644 pressure ( $P_a$ , hPa) and chlorophyll a concentration ( $Chl-a$ , µg L<sup>-1</sup>).

645

| Dependent variable | Independent variable                | Intercept | Slope                         | r <sup>2</sup> | p      |
|--------------------|-------------------------------------|-----------|-------------------------------|----------------|--------|
| All data           |                                     |           |                               |                |        |
| $B_{CH_4}$         | $T_w$                               | -3.80     | 0.39                          | 0.14           | <0.001 |
|                    | $T_w + chl-a$                       | -4.28     | 0.292 + 0.011                 | 0.19           | <0.001 |
|                    | $T_w + chl-a + \Delta T$            | -4.99     | 0.315 + 0.010 + 0.188         | 0.20           | <0.001 |
|                    | $T_w + chl-a + \Delta T + D_{CH_4}$ | -5.04     | 0.271 + 0.010 + 0.206 + 8.687 | 0.20           | <0.001 |
| Spring             |                                     |           |                               |                |        |
| $B_{CH_4}$         | $D_{CH_4}$                          | -1.62     | 40.67                         | 0.17           | <0.001 |
|                    | $D_{CH_4} + \Delta T$               | -2.98     | 43.45 + 0.411                 | 0.20           | <0.001 |
|                    | $D_{CH_4} + \Delta T + T_a$         | -16.29    | 15.78 + 1.406 + 0.787         | 0.26           | <0.001 |
|                    | $\Delta T + T_a$                    | -19.56    | 1.695 + 1.038                 | 0.25           | 0.027  |
|                    | $\Delta T + T_a + P_a$              | -502.71   | 2.74 + 1.998 + 0.459          | 0.32           | 0.013  |
| Summer             |                                     |           |                               |                |        |
| $B_{CH_4}$         | $Chl-a$                             | 2.59      | 0.02                          | 0.13           | <0.001 |
| Autumn             |                                     |           |                               |                |        |
| $B_{CH_4}$         | $T_w$                               | -13.73    | 0.807                         | 0.33           | <0.001 |
| Winter             |                                     |           |                               |                |        |
| $B_{CH_4}$         | $Chl-a$                             | 2.53      | -0.01                         | 0.04           | 0.015  |

646



647 Table 6 Correlation coefficients between daily total diffusive CH<sub>4</sub> flux ( $T_{DCH_4}$ ,  
 648 mg·m<sup>-2</sup>·d<sup>-1</sup>), daily total CH<sub>4</sub> ebullition ( $T_{BCH_4}$ , mg·m<sup>-2</sup>·d<sup>-1</sup>), the frequency of daily  
 649 CH<sub>4</sub> ebullition ( $F_{BCH_4}$ , %) and mean daily environmental variables (Daily mean  
 650 air temperature ( $\overline{T_a}$ , °C), daily mean water temperatures ( $\overline{T_w}$ , °C), daily mean air  
 651 pressure ( $\overline{P_a}$ , hPa), daily mean chlorophyll a ( $\overline{chl-a}$ , µg L<sup>-1</sup>), daily mean  
 652 concentrations of total nitrogen ( $\overline{TN}$ , mg L<sup>-1</sup>) and daily mean concentrations of  
 653 total phosphorus ( $\overline{TP}$ , mg L<sup>-1</sup>)).

654  
 655

| Variable    | $\overline{T_w}$   | $\overline{T_a}$   | $\overline{chl-a}$ | $\overline{P_a}$   | $\overline{TN}$   | $\overline{TP}$   | $F_{BCH_4}$        | $T_{BCH_4}$      |
|-------------|--------------------|--------------------|--------------------|--------------------|-------------------|-------------------|--------------------|------------------|
| $T_{DCH_4}$ | 0.568<br>(0.054)   | 0.537<br>(0.072)   | 0.208<br>(0.517)   | -0.510<br>(0.091)  | -0.499<br>(0.118) | -0.494<br>(0.123) | 0.551<br>(0.063)   | 0.538<br>(0.071) |
| $T_{BCH_4}$ | 0.703**<br>(0.011) | 0.684**<br>(0.014) | 0.660*<br>(0.02)   | -0.650*<br>(0.022) | 0.008<br>(0.982)  | -0.054<br>(0.874) | 0.932**<br>(0.000) |                  |
| $F_{BCH_4}$ | 0.738**<br>(0.006) | 0.735**<br>(0.007) | 0.579**<br>(0.048) | -0.635*<br>(0.026) | 0.086<br>(0.802)  | 0.083<br>(0.808)  |                    |                  |

656

657 \*\*denotes a significant correlation at the 0.01 level; \* denotes a significant correlation  
 658 at the 0.05 level

659



660 Table 7 Parameters of regression models (used in supplement Fig.1) of diffusive and  
 661 ebullitive CH<sub>4</sub> fluxes as a function of water temperatures (*T<sub>w</sub>*) at different  
 662 concentrations of total phosphorous (*TP*).  
 663  
 664  
 665

| Emissions<br>(mg·m <sup>-2</sup> ·h <sup>-1</sup> ) | Averaged TP<br>(mg·L <sup>-1</sup> ) | n   | T <sub>w</sub>  |        |                | T <sub>a</sub>  |        |                |
|-----------------------------------------------------|--------------------------------------|-----|-----------------|--------|----------------|-----------------|--------|----------------|
|                                                     |                                      |     | Q <sub>10</sub> | p      | R <sup>2</sup> | Q <sub>10</sub> | p      | R <sup>2</sup> |
| CH <sub>4</sub> diffusive                           | 0.05                                 | 144 | 1.29            | <0.001 | 0.26           | 1.27            | <0.001 | 0.36           |
|                                                     | 0.1                                  | 96  | 1.79            | <0.001 | 0.46           | 1.62            | <0.001 | 0.58           |
|                                                     | 0.2                                  | 48  | 5.29            | 0.002  | 0.23           | 1.86            | <0.001 | 0.29           |
|                                                     | 0.4                                  | 144 | 7.52            | <0.001 | 0.69           | 5.23            | <0.001 | 0.43           |
|                                                     | 0.8                                  | 96  | 5.24            | <0.001 | 0.76           | 3.24            | <0.001 | 0.71           |
| CH <sub>4</sub> ebullition                          | 0.05                                 | 51  | 1.32            | 0.046  | 0.08           | 1.15            | 0.192  | 0.02           |
|                                                     | 0.1                                  | 52  | 1.85            | 0.211  | 0.04           | 1.27            | 0.407  | 0.02           |
|                                                     | 0.2                                  | --  | --              | --     | --             | --              | --     | --             |
|                                                     | 0.4                                  | --  | --              | --     | --             | --              | --     | --             |
|                                                     | 0.8                                  | 53  | 3.29            | <0.001 | 0.21           | 2.06            | 0.001  | 0.17           |

666  
 667  
 668  
 669

-- indicates that no exponential relationships were found



670 Figure Captions

671

672 Fig. 1 Diurnal and seasonal variability of the main environmental factors and  
673 CH<sub>4</sub> fluxes during the monitoring periods.

674

675 Fig. 2 Bin-averaged diffusive CH<sub>4</sub> flux ( $D_{\text{CH}_4}$ ) and the difference between water and  
676 air temperature ( $\Delta T = T_w - T_a$ ). Symbols showed mean values within each  
677 temperature bin, error bars showed the respective standard deviation (SD represented  
678 the degree to which the data value deviates from the mean). The ellipse of the dotted  
679 line indicated  $D_{\text{CH}_4}$  when  $\Delta T$  was close zero.

680

681 Fig. 3 Changes of CH<sub>4</sub> ebullition ( $B_{\text{CH}_4}$ , histograms) and frequency of daily CH<sub>4</sub>  
682 bubbling (grey area) versus the temperature difference between water and air ( $\Delta$   
683  $T$ ).

684

685 Fig. 4 (a) Daily total diffusive CH<sub>4</sub> flux ( $T_{\text{DCH}_4}$ ), and (b) daily total CH<sub>4</sub> ebullition ( $T_{\text{BCH}_4}$ )  
686 as a function of mean daily water temperature ( $\overline{T_w}$ , black circles) and air temperature  
687 ( $\overline{T_a}$ , open circles). The solid lines represent the exponential relationships between pond  
688 fluxes and  $\overline{T_w}$ , the dashed lines represent the exponential relationships between pond  
689 fluxes and  $\overline{T_a}$ . The values of the temperature coefficient  $Q_{10}$  and the coefficients of  
690 determination ( $R^2$ ) for the exponential fits are provided as labels in each graph.

691

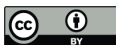

692 Fig. 1 Diurnal and seasonal variability of the main environmental factors and CH<sub>4</sub>  
693 fluxes during the monitoring periods.

694  
695  
696  
697

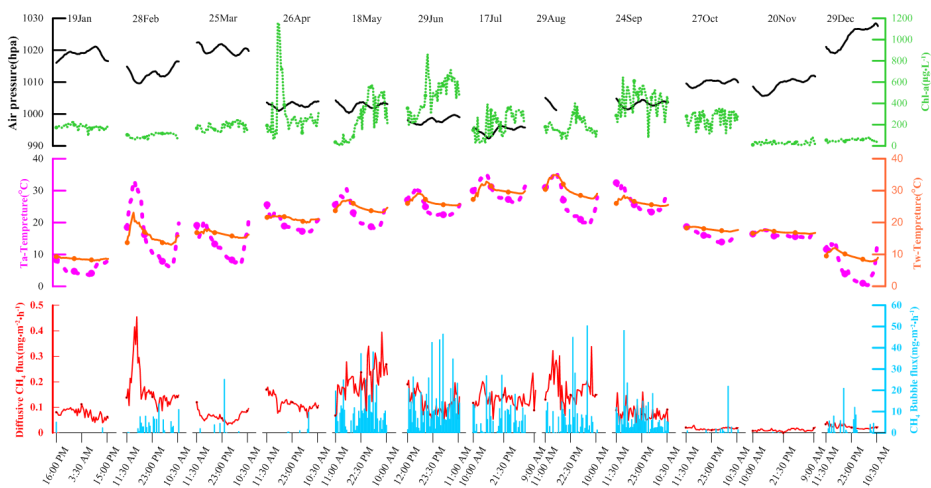

698  
699  
700  
701  
702



703 Fig. 2 Bin-averaged diffusive  $\text{CH}_4$  flux ( $D_{\text{CH}_4}$ ) and the difference between water and air  
704 temperature ( $\Delta T = T_w - T_a$ ). Symbols showed mean values within each temperature bin,  
705 error bars showed the respective standard deviation (SD represented the degree to which the  
706 data value deviates from the mean). The ellipse of the dotted line indicated  $D_{\text{CH}_4}$  when  $\Delta T$   
707 was close zero.

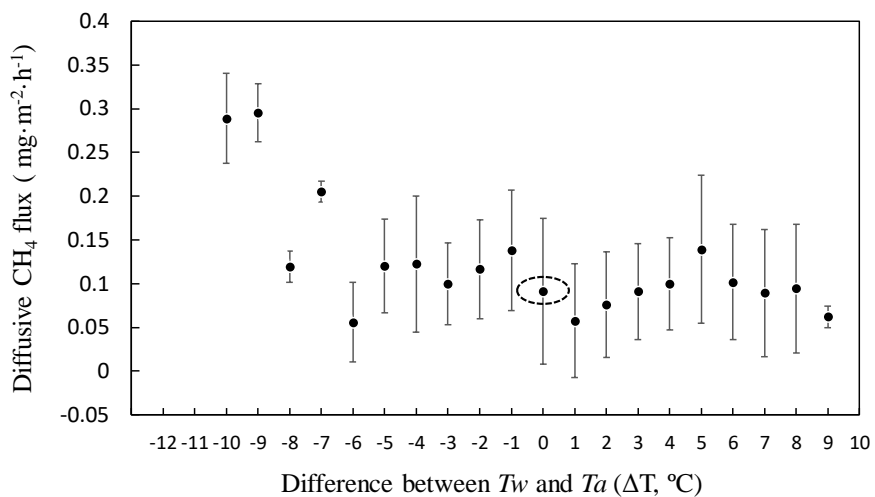

716



717 Fig. 3 Changes of CH<sub>4</sub> ebullition ( $B_{CH_4}$ , histograms) and frequency of daily CH<sub>4</sub> bubbling (grey  
718 area) versus the temperature difference between water and air ( $\Delta T$ ).  
719  
720

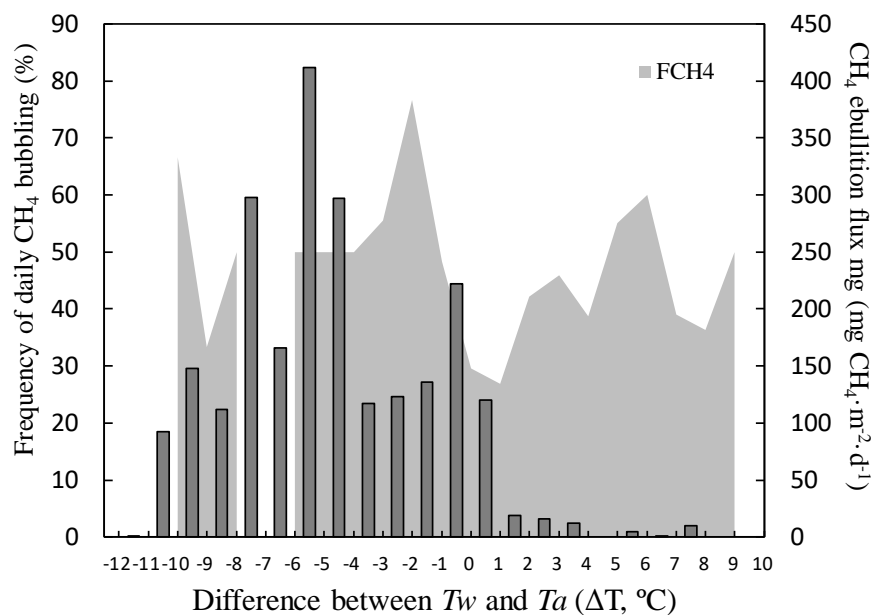



732 Fig. 4 (a) Daily total diffusive  $\text{CH}_4$  flux ( $T_{\text{DCH}_4}$ ), and (b) daily total  $\text{CH}_4$  ebullition ( $T_{\text{BCH}_4}$ ) as a  
733 function of mean daily water temperature ( $\overline{T_w}$ , black circles) and air temperature ( $\overline{T_a}$ , open  
734 circles). The solid lines represent the exponential relationships between pond fluxes and  $\overline{T_w}$ ,  
735 the dashed lines represent the exponential relationships between pond fluxes and  $\overline{T_a}$ . The  
736 values of the temperature coefficient  $Q_{10}$  and the coefficients of determination ( $R^2$ ) for the  
737 exponential fits are provided as labels in each graph.  
738

739

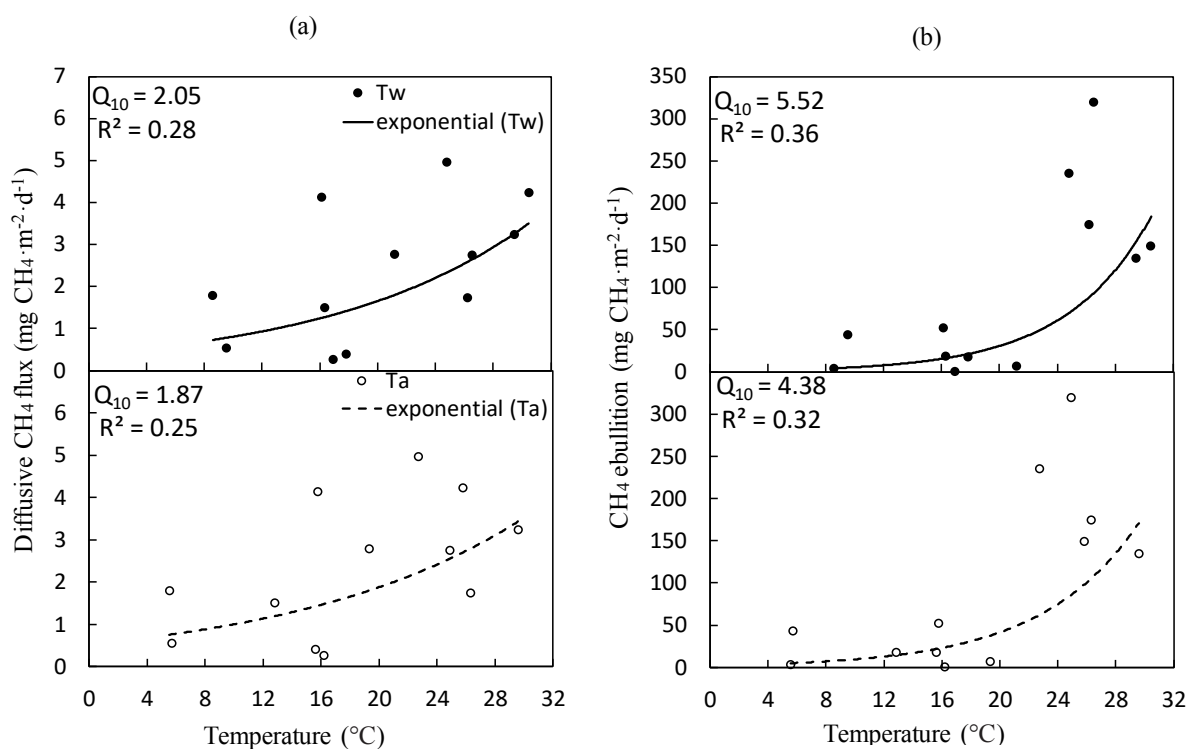

Supplement: Supplementary file [file bg-2020-178-RC1-supplement.pdf]
